# Supplementary material for: Acne Subject Preference for Pump Over Tube for Dispensing Fixed-Dose Combination Adapalene 0.1%–Benzoyl Peroxide 2.5% Gel
Source: Springer Nature journal article supplement (doi:10.1007/s13555-014-0054-1), 2014-06-01
Supplement: MOESM1 [file 9271030]

- Key to a patient's success on adapalene—benzoyl peroxide (BPO) is ensuring that this fixed-dose combination product is consistently applied to the entire acne-affected areas.
- The objective of this present US open-label study was to evaluate patient preference for two different containers for dispensing adapalene—BPO gel (tube vs. pump).
- Among subjects who completed the subject preference survey (n=291), 79.0% (n=230) preferred the pump for dispensing adapalene—BPO gel and 21.0% (n=61) preferred the tube (p<0.001).
- A total of 91.8% (n=267/291) of subjects reported being satisfied (very satisfied or satisfied) with their experience of using the pump on a patient self-assessment scale (p<0.001).
- Patient preference for using a pump instead of a tube to dispense adapalene—BPO gel helps to ensure consistent application and thus may improve patient adherence to the prescribed acne treatment regimen.

This summary slide represents the opinions of the authors. Sponsorship for this study was funded by Galderma. Editorial assistance for this study was provided by Dr. Lisa Swanson of Havas Life Medicom. For a full list of acknowledgments and conflicts of interest for all authors of this article, please see the full text online. Copyright © The Authors 2014. Creative Commons Attribution Noncommercial License (CC BY-NC).
